# Supplementary material
Source: HighWire-hosted journal article supplement (https://mentalhealth.bmj.com/content/27/1/e300982)
Supplement: inline-supplementary-material-1 [file inline-supplementary-material-1.pdf]

## **ELECTRONIC SUPPLEMENTARY FILE 1 (ESF1)**

Predictors of increased affective symptoms and suicidal ideation during the COVID-19 pandemic: a large-scaled study on 16,554 Thai adults.

(1) Thitiporn Supasitthumrong<sup>\*</sup>, (1-7) Michael Maes<sup>\*</sup>, (1) Chavit Tunvirachaisakul, (1) Teerayuth Rungnirundorn, (5,6) Bo Zhou, (5,6) Jing Li, (1) Sorawit Wainipitapong, (1) Anchalita Ratanajaruraks, (1) Chaichana Nimnuan, (1) Buranee Kanchanatawan, (8) Trevor Thompson, (9-12) Christoph U. Correll<sup>\*\*</sup>, (11,13-15) Marco Solmi<sup>\*\*</sup>.

\* Joint first authorship.

\*\* Joint last authorship

**ESF Table 1.** COH-FIT Questions; the various questions used to evaluate affective symptoms and the questions that evaluate the attribution of symptoms to self-isolation/distancing and observing to spread and knowing the risk of COVID-19 outbreaks.

| ความวิตกกังวล                                                                           | <b>Anxiety: rate from 0 (never) to 100 (most of the time)</b>                                                                                 |
|-----------------------------------------------------------------------------------------|-----------------------------------------------------------------------------------------------------------------------------------------------|
| ในสองสัปดาห์ที่ผ่านมา คุณรู้สึกประหม่า วิตกกังวลหรือตึงเครียดมาก                        | In the last two weeks, did you feel nervous, anxious, or on edge?                                                                             |
| ในสองสัปดาห์ที่ผ่านมา คุณไม่สามารถหยุดหรือควบคุมความกังวลได้                            | In the last two weeks, could you not stop or control your worries?                                                                            |
| จากที่ตอบไป อาการที่แย่ที่สุด เกิดจากการเห็นหรือได้ยินการเสี่ยงคิดโรคโควิด 19 มากแค่ไหน | How much do you feel the most severe of these problems are due to observing the spread, and knowing the risks, of the COVID-19 outbreak?      |
| อาการนี้มีความสัมพันธ์กับการกักตัวเองหรือ เว้นระยะห่างจากผู้อื่นแค่ไหน                  | How much to self-isolation/physical distancing?                                                                                               |
| ปัญหาเหล่านี้ เคยเป็นอย่างไรในก่อนช่วง 2 สัปดาห์ก่อนที่มีการระบาดของโรคโควิด-19         | How did you feel with regards to the most severe of these problems in the last two weeks of your "regular" life BEFORE the COVID-19 outbreak? |
| อาการซึมเศร้า                                                                           | <b>Depression: rate from 0 (never) to 100 (most of the time)</b>                                                                              |
| ในสองสัปดาห์ที่ผ่านมา คุณไม่อยากทำอะไรหรือมีความสนใจต่อสิ่งต่าง ๆ น้อยลง                | In the last two weeks, did you have less interest or pleasure in doing things?                                                                |
| ในสองสัปดาห์ที่ผ่านมา คุณรู้สึกเศร้า หดหู่ หรือหมดหวัง                                  | In the last two weeks, did you feel down, depressed, or hopeless?                                                                             |
| จากที่ตอบไป อาการที่แย่ที่สุด เกิดจากการเห็นหรือได้ยินการเสี่ยงคิดโรคโควิด 19 มากแค่ไหน | How much do you feel the most severe of these problems are due to observing the spread, and knowing the risks, of COVID-19?                   |
| อาการนี้มีความสัมพันธ์กับการกักตัวเองหรือ เว้นระยะห่างจากผู้อื่นแค่ไหน                  | How much related to self-isolation/physical distancing?                                                                                       |
| ปัญหาเหล่านี้ เคยเป็นอย่างไรในก่อนช่วง 2 สัปดาห์ก่อนที่มีการระบาดของโรคโควิด-19         | How did you feel with regards to the most severe of these problems in the last two weeks of your "regular" life BEFORE the COVID-19 outbreak? |
| ประสบการณ์ที่ตึงเครียด                                                                  | <b>PTSD: rate from 0 (never) to 100 (most of the time)</b>                                                                                    |
| ในสองสัปดาห์ที่ผ่านมา คุณมีภาพความจำ ความคิดหรือภาพซ้ำๆ หรือความฝันจากประสบการณ์เครียด  | In the last two weeks, did you have repeated disturbing memories, thoughts, or images, or dreams of the stressful experience?                 |

|                                                                                                                                                         |                                                                                                                                                                                                     |
|---------------------------------------------------------------------------------------------------------------------------------------------------------|-----------------------------------------------------------------------------------------------------------------------------------------------------------------------------------------------------|
| ในสองสัปดาห์ที่ผ่านมา คุณรู้สึกเหมือนกลับไปอยู่ในเหตุการณ์นั้น ราวกับว่าเหตุการณ์นั้นเกิดขึ้นอีกครั้ง                                                   | In the last two weeks, did you suddenly acted or felt as if the stressful experience was happening again (as if you were reliving it)?                                                              |
| ในสองสัปดาห์ที่ผ่านมา คุณต้องพยายามหลีกเลี่ยงการคิดหรือการพูดคุยที่มีส่วนเกี่ยวข้องหรือหลีกเลี่ยง                                                       | In the last two weeks, did you avoid thinking about, or talking about, or having feelings related to, or avoiding engaging in activities or situations that remind you of the stressful experience? |
| ในสองสัปดาห์ที่ผ่านมา คุณรู้สึกกระแฉะระวังตัวมากกว่าปกติ                                                                                                | In the last two weeks, were you "super alert" or watchful or on guard?                                                                                                                              |
| จากที่ตอบไป อาการที่แย่ที่สุด เกิดจากการเห็นหรือได้ยินการเสี่ยงคิดโรคโควิด 19 มากแค่ไหน                                                                 | How much do you feel the most severe of these problems are due to observing the spread, and knowing the risks, of the COVID-19 outbreak?                                                            |
| อาการนี้มีความสัมพันธ์กับการกักตัวเองหรือ เว้นระยะห่างจากผู้อื่นแค่ไหน                                                                                  | How much to self-isolation/physical distancing?                                                                                                                                                     |
| คุณรู้สึกอย่างไรกับปัญหาที่เกิดขึ้นในช่วง 2 สัปดาห์สุดท้ายที่ยังใช้ชีวิตปกติก่อนโควิด 19                                                                | How did you feel with regards to the most severe of these problems in the last two weeks of your "regular" life BEFORE the COVID-19 outbreak?                                                       |
| <b>อาการย้ำคิดย้ำทำ</b>                                                                                                                                 | <b>OCD: rate from 0 (never) to 100 (most of the time)</b>                                                                                                                                           |
| ในช่วงสองสัปดาห์ที่ผ่านมา คุณมีความคิดรบกวนที่ผุดขึ้นมาในใจบ่อยแค่ไหน                                                                                   | In the last two weeks, have you been experiencing thoughts that are frequent, unwelcome and intrusive?                                                                                              |
| ในช่วงสองสัปดาห์ที่ผ่านมา คุณมีความรู้สึกที่จะต้องทำอะไรซ้ำๆ                                                                                            | In the last two weeks, did you experience a strong urge to execute and repeat behaviors or mental acts?                                                                                             |
| จากที่ตอบไป อาการที่แย่ที่สุด เกิดจากการเห็นหรือได้ยินการเสี่ยงคิดโรคโควิด 19 มากแค่ไหน                                                                 | How much do you feel these problems are due to observing the spread, and knowing the risks, of the COVID-19 outbreak?                                                                               |
| อาการนี้มีความสัมพันธ์กับการกักตัวเองหรือ เว้นระยะห่างจากผู้อื่นแค่ไหน                                                                                  | How much to self-isolation/physical distancing?                                                                                                                                                     |
| คุณรู้สึกอย่างไรกับปัญหาที่เกิดขึ้นในช่วง 2 สัปดาห์สุดท้ายที่ยังใช้ชีวิตปกติก่อนโควิด 19                                                                | How did you feel with regards to the same problems in the last two weeks of your "regular" life BEFORE the COVID-19 outbreak?                                                                       |
| <b>อารมณ์แปรปรวน</b>                                                                                                                                    | <b>Mood swings: rate from 0 (never) to 100 (most of the time)</b>                                                                                                                                   |
| ในช่วงสองสัปดาห์ที่ผ่านมา ตั้งแต่เริ่มระบาดของโรคโควิด 19 คุณมีอาการแปรปรวนบ่อยแค่ไหน เช่น อารมณ์เศร้าหรือมีความสุขมาก หรืออารมณ์หงุดหงิด เกิดขึ้นทันที | In the last two weeks SINCE the COVID-19 outbreak, how much did you experience mood swings? (mood suddenly changing to depressed, or to euphoric or irritable)                                      |

|                                                                                              |                                                                                                                                  |
|----------------------------------------------------------------------------------------------|----------------------------------------------------------------------------------------------------------------------------------|
| จากที่ตอบไป อาการที่แย่ที่สุด เกิดจากการเห็นหรือได้ยินการ<br>เสี่ยงคิดโรคโควิด 19 มากแค่ไหน  | How much do you feel this is due to observing the spread, and knowing the risks, of the<br>COVID-19 outbreak?                    |
| อาการนี้มีความสัมพันธ์กับการกักตัวเองหรือ เว้นระยะห่าง<br>จากผู้อื่นแค่ไหน                   | How much to self-isolation/physical distancing?                                                                                  |
| คุณรู้สึกอย่างไรกับปัญหาที่เกิดขึ้นในช่วง 2 สัปดาห์สุดท้ายที่<br>ยังใช้ชีวิตปกติก่อนโควิด 19 | How did you feel with regards to the same problems in the last two weeks of your "regular"<br>life BEFORE the COVID-19 outbreak? |

On every item we asked the participants to rate a Likert scale from 0 to 100, where 0 is never (less severity) and 100 is the most severe (everyday).

**ESF, Table 2.** COH-FIT Questions; Questions that screen social isolation and contact with COVID-19.

| คำถาม                                                                                  | Questions                                                                                                        |
|----------------------------------------------------------------------------------------|------------------------------------------------------------------------------------------------------------------|
| ตั้งแต่โรคโควิด 19 เริ่มระบาด คุณถูกกักตัวเป็นระยะเวลากี่วัน                           | SINCE the start of the COVID-19 outbreak, how many days have you been in quarantine?                             |
| เท่าที่คุณทราบ คุณเคยอยู่ในบริเวณเดียวกันกับผู้ติดเชื้อโควิด 19 หรือไม่                | Have you been in the same physical space with COVID-19 cases, that you know of?                                  |
| คุณมีปฏิสัมพันธ์กับผู้ป่วยโรคโควิด 19 อย่างไร                                          | How have you come in direct contact with COVID-19 cases?                                                         |
| มีจำนวนผู้ติดเชื้อโควิด 19 กี่รายที่คุณมีปฏิสัมพันธ์ด้วยระหว่างที่คุณทำงาน             | How many positive COVID-19 cases, that you know of, have you been in contact with during your work?              |
| ถ้าเกิน 10 ราย มีจำนวนผู้ติดเชื้อที่คุณมีปฏิสัมพันธ์ด้วยทั้งหมดกี่ราย                  | Please specify exact number of cases (if more than 10).                                                          |
| มีผู้ป่วยที่ติดเชื้อโควิด 19 จำนวนกี่รายที่เสียชีวิตในบรรดาผู้ที่คุณทำงานด้วย          | How many patients with positive COVID-19 infection died, among those that you worked with?                       |
| ถ้าเกิน 10 ราย มีจำนวนผู้ติดเชื้อที่คุณมีปฏิสัมพันธ์ด้วยทั้งหมดกี่ราย                  | Please specify exact number of patients (if more than 10).                                                       |
| คุณเคยต้องตัดสินใจที่จะปฏิเสธการรับเข้าการรักษา โควิด 19 ในระหว่างการทำงานหรือไม่      | Did you ever have to make the decision not to admit, treat or help a COVID-19 positive patient during your work? |
| สถานที่ที่ทำงานอยู่ในปัจจุบันมีมาตรการเข้มงวดเกี่ยวกับการควบคุมโควิด 19 มากน้อยเพียงใด | How strict are ongoing restrictions due to COVID-19 where you currently live?                                    |
| ในช่วงสองสัปดาห์ที่ผ่านมา คุณมีอาการของ โควโรนาไวรัสหรือไม่                            | In the last two weeks, have you had symptoms which are typical of Coronavirus?                                   |
| คุณได้รับการตรวจโรคโควิด 19 จำนวนกี่ครั้ง                                              | How many times have you been tested for COVID-19?                                                                |

|                                                                                  |                                                                                                  |
|----------------------------------------------------------------------------------|--------------------------------------------------------------------------------------------------|
| ผลการตรวจของคุณเป็นบวกกี่ครั้ง                                                   | Did you test positive?                                                                           |
| คุณเคยรู้สึกว่าได้กลิ่นน้อยลงก่อนมีอาการเหล่านั้นหรือก่อนการทดสอบเป็นบวกหรือไม่? | Did you experience a decreased sense of smell before those symptoms, or before testing positive? |
| คุณเข้ารับการรักษาในโรงพยาบาลเนื่องจากป่วยด้วยโรคโควิด 19 หรือไม่                | Have you been admitted to a hospital because of COVID-19?                                        |
| มีคนใกล้ชิดกับคุณติดเชื้อ โควิด 19 หรือไม่                                       | Has anyone close to you been infected by COVID-19?                                               |
| มีคนใกล้ชิดกับคุณต้องเข้ารับการรักษาในโรงพยาบาลเพราะโรคโควิด 19 หรือไม่          | Has anyone close to you been admitted to a hospital because of COVID-19?                         |
| มีคนใกล้ชิดกับคุณเสียชีวิตเพราะโรคโควิด19 หรือไม่                                | Has anyone close to you died because of COVID-19?                                                |

**ESF Table 3.** COH-FIT Questions; the various questions used to evaluate other predictors of the general affective symptom dimension.

| ประสบการณ์ที่ไม่พึงประสงค์                                      | Adverse experiences                                                                            |
|-----------------------------------------------------------------|------------------------------------------------------------------------------------------------|
| คุณเคยมีประสบการณ์ที่เจ็บปวดหรือไม่พึงประสงค์ตอนเป็นเด็กหรือไม่ | Have you been exposed to any significant traumatic or adverse experiences as a CHILD? (yes/no) |
| ถูกละเลย (ไม่ใส่ใจต่อสุขภาพกายและอารมณ์ของคุณ)                  | If Yes; please specify                                                                         |
| การละเมิดทางวาจา                                                | 1 Neglect (poor attention to your physical or emotional well-being)                            |
| การทำร้ายร่างกาย                                                | 2 Verbal abuse                                                                                 |
| การล่วงละเมิดทางเพศ                                             | 3 Physical abuse                                                                               |
| ความรุนแรงในครอบครัว                                            | 4 Sexual abuse                                                                                 |
| ความเจ็บป่วยทางจิตของผู้ปกครอง / ผู้ดูแล                        | 5 Domestic violence                                                                            |
| การใช้สารเสพติดโดยผู้ปกครอง / ผู้ดูแล                           | 6 Parental/caregiver mental illness                                                            |
| การหย่าร้างของผู้ปกครอง / การแยกผู้ดูแล                         | 7 Parental/caregiver substance abuse                                                           |
| ผู้ปกครอง / ผู้ดูแลถูกจำคุกหรือกักขัง                           | 8 Parental divorce/caregiver separation                                                        |
| ภัยพิบัติทางธรรมชาติ                                            | 9 Parental/caregiver incarceration                                                             |
| เห็นคนกำลังจะตาย                                                | 10 Natural disaster                                                                            |
| เห็นคนถูกฆ่าตาย                                                 | 11 Witnessing someone dying                                                                    |
| เห็นคนถูกข่มขืน                                                 | 12 Witnessing someone being killed                                                             |
|                                                                 | 13 Witnessing someone being raped                                                              |

|                                                                            |                                                                                                  |
|----------------------------------------------------------------------------|--------------------------------------------------------------------------------------------------|
| สงครามหรือการใช้อาวุธ<br>อุบัติเหตุ, การบาดเจ็บ<br>อื่น ๆ                  | 14 War or armed conflict<br>15 Major accident/injury/illness<br>16 Other                         |
| คุณเคยมีประสบการณ์ที่เจ็บปวดหรือไม่เพียงประสงค์ตอน เป็นผู้ใหญ่หรือไม่      | Have you been exposed to any significant traumatic or adverse experiences as an ADULT?           |
| การละเมิดทางวาจา                                                           | 1 Verbal abuse                                                                                   |
| การทำร้ายร่างกาย                                                           | 2 Physical abuse                                                                                 |
| การล่วงละเมิดทางเพศ                                                        | 3 Sexual abuse                                                                                   |
| ความรุนแรงในครอบครัว                                                       | 4 Domestic violence                                                                              |
| ภัยพิบัติทางธรรมชาติ                                                       | 5 Natural disaster                                                                               |
| เห็นคนกำลังจะตาย                                                           | 6 Witnessing someone dying                                                                       |
| เห็นคนถูกฆ่าตาย                                                            | 7 Witnessing being being killed                                                                  |
| เห็นคนถูกข่มขืน                                                            | 8 Witnessing someone being raped                                                                 |
| สงครามหรือการใช้อาวุธ                                                      | 9 War or armed conflict                                                                          |
| อุบัติเหตุ, การบาดเจ็บ                                                     | 10 Major accident/injury/illness                                                                 |
| อื่น ๆ                                                                     | 11 Other                                                                                         |
| <b>สุขภาพจิต</b>                                                           | <b>Mental health</b>                                                                             |
| ในช่วงสองสัปดาห์ที่ผ่านมา โดยทั่วไปสุขภาพจิตหรือสภาพจิตใจของคุณเป็นอย่างไร | In general, in the last two weeks, how would you rate your mental health? 0 (poor) to 100 (good) |



|                                                                                                                                                                                                                                                                                                                                                                                                                                                |                                                                                                                                                                                                                                                                                                                                                                                                                                                                                                                                                                                                                                    |
|------------------------------------------------------------------------------------------------------------------------------------------------------------------------------------------------------------------------------------------------------------------------------------------------------------------------------------------------------------------------------------------------------------------------------------------------|------------------------------------------------------------------------------------------------------------------------------------------------------------------------------------------------------------------------------------------------------------------------------------------------------------------------------------------------------------------------------------------------------------------------------------------------------------------------------------------------------------------------------------------------------------------------------------------------------------------------------------|
| <p>เทียบกับสองสัปดาห์สุดท้ายที่ยังใช้ชีวิตปกติก่อนเกิดเรื่องโควิด 19 เป็นอย่างไร</p>                                                                                                                                                                                                                                                                                                                                                           | <p>And what about in the last two weeks of your "regular" life BEFORE the COVID-19 outbreak?<br/>0 (poor) to 100 (good)</p>                                                                                                                                                                                                                                                                                                                                                                                                                                                                                                        |
| <p>คุณเคยถูกวินิจฉัยโดยแพทย์หรือนักจิตวิทยาว่าป่วยเป็น โรคทางจิตหรือไม่</p> <p>Anorexia nervosa</p> <p>โรคสมาธิสั้น/สมาธิสั้น (ADHD)</p> <p>ออทิสติก</p> <p>โรคสองขั้ว</p> <p>บูลิเมีย/ ความผิดปกติของการกิน</p> <p>โรคประสาทหลอน</p> <p>โรคติดการพนัน</p> <p>โรควิตกกังวลทั่วไป</p> <p>โรคซึมเศร้า</p> <p>โรคย้ำคิดย้ำทำ</p> <p>โรคตื่นตระหนก</p> <p>บุคลิกภาพผิดปกติ</p> <p>ภาวะป่วยทางจิตจากเหตุการณ์รุนแรง</p> <p>ปัญหาการใช้แอลกอฮอล์</p> | <p>Have you ever been diagnosed with a mental health conditions by a doctor or psychologist? (YES/NO)</p> <p>If Yes; please specify</p> <p>1 Anorexia Nervosa</p> <p>2 Attention-deficit/hyperactivity disorder (ADHD)</p> <p>3 Autism</p> <p>4 Bipolar disorder</p> <p>5 Bulimia nervosa/Binge eating disorder</p> <p>6 Delusional disorder</p> <p>7 Gambling disorder</p> <p>8 Generalized anxiety disorder</p> <p>9 Major depressive disorder</p> <p>10 Obsessive-compulsive disorder</p> <p>11 Panic disorder</p> <p>12 Personality disorder</p> <p>13 Post-traumatic stress disorder</p> <p>14 Problematic use of alcohol</p> |

|                                                                                                                                  |                                                                                                                                                                            |
|----------------------------------------------------------------------------------------------------------------------------------|----------------------------------------------------------------------------------------------------------------------------------------------------------------------------|
| การใช้สารที่มีปัญหา (นอกเหนือจากแอลกอฮอล์)<br>โรคจิต<br>โรคจิตเภท/โรคจิตเภท<br>ความวิตกกังวลทางสังคม<br>อื่นๆ (โปรดระบุด้านล่าง) | 15 Problematic use of substances (other than alcohol)<br>16 Psychosis<br>17 Schizophrenia/Schizoaffective disorder<br>18 Social anxiety<br>19 Other (please specify below) |
| คุณได้รับผลกระทบจากความผิดปกติทางจิตอะไรบ้าง                                                                                     | What other mental/psychological disorder are you affected by?                                                                                                              |
| ในช่วงสองสัปดาห์ที่ผ่านมา โดยทั่วไปสุขภาพจิตหรือสภาพจิตใจของคุณเป็นอย่างไร                                                       | In general, in the last two weeks, how would you rate your mental health? 0 (poor)   100 (good)                                                                            |
| เทียบกับสองสัปดาห์สุดท้ายที่ยังใช้ชีวิตปกติก่อนเกิดเรื่อง โควิด 19 เป็นอย่างไร                                                   | And what about in the last two weeks of your "regular" life BEFORE the COVID-19 outbreak? 0 (poor)   100 (good)                                                            |
| <b>การปรับตัว</b>                                                                                                                | <b>Resilience</b>                                                                                                                                                          |
| คุณมีแนวโน้มที่จะกลับเข้าสู่ภาวะปกติได้อย่างรวดเร็วมากน้อยแค่ไหน                                                                 | How much do you tend to bounce back quickly after hard times? 0 (poor)   100 (good)                                                                                        |
| และเทียบกับสองสัปดาห์สุดท้ายที่ยังใช้ชีวิตปกติก่อนเกิดเรื่อง โควิด 19                                                            | And what about the last two weeks of "regular" life BEFORE the COVID-19 outbreak? 0 (poor)   100 (good)                                                                    |
| <b>การสนับสนุนทางสังคม</b>                                                                                                       | <b>Social support</b>                                                                                                                                                      |
| ในช่วงสองสัปดาห์ที่ผ่านมา มีกี่คนที่สนิทกับคุณ จนคุณสามารถวางใจได้                                                               | How helpless have you felt in the last two weeks?<br>0 (poor)   100 (good)                                                                                                 |

|                                                                                          |                                                                                                                                                                |
|------------------------------------------------------------------------------------------|----------------------------------------------------------------------------------------------------------------------------------------------------------------|
| คุณเป็นอย่างไรบ้างในช่วง 2 สัปดาห์สุดท้ายที่ยังใช้ชีวิตปกติก่อนโควิด 19                  | And what about in the last two weeks of your "regular" life BEFORE the COVID-19 outbreak? 0 (poor)   100 (good)                                                |
| <b>ความกลัวการติดเชื้อโควิด</b>                                                          | <b>Fear of COVID</b>                                                                                                                                           |
| ในช่วงสองสัปดาห์ที่ผ่านมา คุณรู้สึกกลัวการติดเชื้อ โควิด 19 แค่ไหน                       | How scared have you been of getting the infection, in the last two weeks? 0 (Not at all)   100 (Very much)                                                     |
| แล้วการติดเชื้ออื่น เทียบกับ 2 สัปดาห์สุดท้ายก่อนเกิดเรื่อง โควิด 19 ช่วงนั้นเป็นอย่างไร | And what about other infections, in the last two weeks of your "regular" life BEFORE the COVID-19 outbreak?<br>0 (Not at all)   100 (Very much)                |
| <b>อุปกรณ์การป้องกัน</b>                                                                 | <b>Protective devices</b>                                                                                                                                      |
| ในช่วง 2 สัปดาห์ที่ผ่านมา คุณเข้าถึงอุปกรณ์ป้องกันได้มากน้อยเพียงใด                      | In the past 2 weeks, how many time could you access protective devices? 0 (Less)   100 (the Most)                                                              |
| <b>ความสัมพันธ์</b>                                                                      | <b>Relationships</b>                                                                                                                                           |
| ในช่วงสองสัปดาห์ที่ผ่านมา ฟังพอใจกับปฏิสัมพันธ์ระหว่างผู้ที่อยู่อาศัยร่วมกันเพียงใด      | How satisfaction are you with the way your family gets along with each other at home, in the last two weeks?<br>0 (not satisfy)   100 (very much satisfaction) |
| และเทียบกับสองสัปดาห์สุดท้ายที่ยังใช้ชีวิตปกติก่อนเกิดเรื่อง โควิด 19                    | And what about in the last two weeks of your "regular" life BEFORE the Coronavirus outbreak?<br>0 (not satisfy)   100 (very much satisfaction)                 |
| ในช่วงสองสัปดาห์ที่ผ่านมา คุณฟังพอใจกับปฏิสัมพันธ์ระหว่างสมาชิกในครอบครัวเพียงใด         | How satisfaction are you with your family's daily routine, in the last two weeks?<br>0 (not satisfy)   100 (very much satisfaction)                            |

|                                                                                                     |                                                                                                                                                             |
|-----------------------------------------------------------------------------------------------------|-------------------------------------------------------------------------------------------------------------------------------------------------------------|
| และเทียบกับสองสัปดาห์สุดท้ายที่ยังใช้ชีวิตปกติก่อนเกิดเรื่องโควิด 19                                | And what about in the last two weeks of your "regular" life BEFORE the Coronavirus outbreak?<br>0 (not satisfy)   100 (very much satisfaction)              |
| ในช่วงสองสัปดาห์ที่ผ่านมา คุณพึงพอใจกับปฏิสัมพันธ์กับเพื่อนมากแค่ไหน                                | How satisfaction are you with the way your friends have got along with each other, in the last two weeks?<br>0 (not satisfy)   100 (very much satisfaction) |
| และเทียบกับสองสัปดาห์สุดท้ายที่ยังใช้ชีวิตปกติก่อนเกิดเรื่องโควิด 19                                | And what about in the last two weeks of your "regular" life BEFORE the Coronavirus outbreak?<br>0 (not satisfy)   100 (very much satisfaction)              |
| <b>สุขภาพร่างกาย</b>                                                                                | <b>Physical health</b>                                                                                                                                      |
| ในช่วงสองสัปดาห์ที่ผ่านมา คุณจะให้คะแนนสุขภาพร่างกายโดยทั่วไปของคุณอย่างไร                          | In general, in the last two weeks, how would you rate your physical health?<br>0 (poor)   100 (very healthy)                                                |
| และเทียบกับสองสัปดาห์สุดท้ายที่ยังใช้ชีวิตปกติก่อนเกิดโควิด 19 ช่วงนั้นเป็นอย่างไร                  | And what about in the last two weeks of your "regular" life BEFORE the COVID-19 outbreak?<br>0 (poor)   100 (very healthy)                                  |
| คุณเคยได้รับการวินิจฉัยจากบุคลากรทางการแพทย์ว่าป่วยเป็นโรคทางกายหรือไม่<br><br>โรคภูมิแพ้<br>หอบหืด | Have you ever been diagnosed with a medical disease by a health care professional? (Yes/No)<br><br>If Yes, please specify<br><br>1 Allergy<br><br>2 Asthma  |

|                                                               |                                                                 |
|---------------------------------------------------------------|-----------------------------------------------------------------|
| มะเร็ง                                                        | 3 Cancer                                                        |
| ต้อกระจก                                                      | 4 Cataract                                                      |
| ปวดท้องเรื้อรัง                                               | 5 Chronic abdominal pain                                        |
| อาการท้องผูกเรื้อรัง                                          | 6 Chronic constipation                                          |
| ท้องเสียเรื้อรัง                                              | 7 Chronic diarrhoea                                             |
| ปวดหลังเรื้อรัง                                               | 8 Chronic low back pain                                         |
| ไมเกรนเรื้อรัง/ปวดหัว                                         | 9 Chronic migraine/headache                                     |
| ปวดคอเรื้อรัง                                                 | 10 Chronic neck pain                                            |
| โรคผิวหนังเรื้อรัง                                            | 11 Chronic skin disease                                         |
| เบาหวานชนิดที่ 1                                              | 12 Diabetes type 1                                              |
| เบาหวานชนิดที่ 2                                              | 13 Diabetes type 2                                              |
| ภาวะอวัยวะหรือโรคปอดอุดกั้นเรื้อรัง (COPD)                    | 14 Emphysema or chronic obstructive pulmonary disease (COPD)    |
| ริดสีดวงทวาร                                                  | 15 Haemorrhoids                                                 |
| ความดันโลหิตสูง                                               | 16 Hypertension                                                 |
| โรคลำไส้อักเสบ                                                | 17 Inflammatory bowel disease                                   |
| บาดเจ็บ                                                       | 18 Injury                                                       |
| โรคตับ                                                        | 19 Liver disease                                                |
| กล้ามเนื้อหัวใจตาย / โรคหลอดเลือดหัวใจตีบ / โรคหลอดเลือดหัวใจ | 20 Myocardial infarction/angina pectoris/coronary heart disease |

|                                                                                    |                                                                                                                                   |
|------------------------------------------------------------------------------------|-----------------------------------------------------------------------------------------------------------------------------------|
| โรคอ้วน                                                                            | 21 Obesity                                                                                                                        |
| โรคข้อเข่าเสื่อม                                                                   | 22 Osteoarthritis                                                                                                                 |
| โรคกระดูกพรุน                                                                      | 23 Osteoporosis                                                                                                                   |
| โรคแผลในกระเพาะอาหาร                                                               | 24 Peptic ulcer disease                                                                                                           |
| โรคไต                                                                              | 25 Renal disease                                                                                                                  |
| จอประสาทตา                                                                         | 26 Retinopathy                                                                                                                    |
| โรคหลอดเลือดสมอง/โรคหลอดเลือดสมอง                                                  | 27 Stroke/cerebrovascular disease                                                                                                 |
| โรคต่อมไทรอยด์                                                                     | 28 Thyroid disease                                                                                                                |
| ภาวะกลั้นปัสสาวะไม่ได้                                                             | 29 Urinary incontinence                                                                                                           |
| เส้นเลือดขอด                                                                       | 30 Varicose veins of lower extremities                                                                                            |
| อื่นๆ (โปรดระบุด้านล่าง)                                                           | 31 Other (please specify below)                                                                                                   |
| <b>ความเจ็บปวด</b>                                                                 | <b>Physical pain</b>                                                                                                              |
| ในช่วงสองสัปดาห์ที่ผ่านมา คุณจะให้ระดับคะแนนความเจ็บปวดทางร่างกายอย่างไร           | Please rate the level of physical pain that you have been experiencing in the last two weeks.<br>0 (not at all)   100 (very much) |
| และเทียบกับสองสัปดาห์สุดท้ายที่ยังใช้ชีวิตปกติก่อนเกิดโควิด 19 ช่วงนั้นเป็นอย่างไร | And what about the last two weeks of your "regular" life BEFORE the COVID-19 outbreak?<br>0 (not at all)   100 (very much)        |
| <b>อาการแพนิค</b>                                                                  | <b>Panic attacks</b>                                                                                                              |

|                                                                                                |                                                                                                                                                                 |
|------------------------------------------------------------------------------------------------|-----------------------------------------------------------------------------------------------------------------------------------------------------------------|
| ในช่วงสองสัปดาห์ที่ผ่านมา คุณมีอาการแพนิคกี่ครั้ง                                              | In the last two weeks, how many panic attacks have you experienced?                                                                                             |
| โปรดระบุจำนวนครั้งหากมากกว่า 20                                                                | Please specify how many panic attacks, if more than 20.                                                                                                         |
| คุณเป็นอย่างไรบ้างในช่วง 2 สัปดาห์สุดท้ายที่ยังใช้ชีวิตปกติก่อนโควิด 19                        | And what about in the last two weeks of your "regular" life BEFORE the COVID-19 outbreak?                                                                       |
| <b>การฆ่าตัวตาย</b>                                                                            | <b>Suicidal ideation</b>                                                                                                                                        |
| ในช่วงสองสัปดาห์ที่ผ่านมา คุณคิดฆ่าตัวตายบ่อยแค่ไหน                                            | In the last two weeks, how often did you think about killing yourself? Rate from 0 (not at all)   100 (very much)                                               |
| ในช่วงสองสัปดาห์ที่ผ่านมา คุณพยายามจบชีวิตตนเองกี่ครั้ง                                        | In the last two weeks, how often did you think about killing yourself? Specify number                                                                           |
| <b>ความพึงพอใจต่อปฏิสัมพันธ์ที่มีในครอบครัว</b>                                                | <b>Pandemic household satisfaction interaction</b>                                                                                                              |
| คุณมีความพึงพอใจเพียงใดกับปฏิสัมพันธ์ระหว่างบุคคลในที่อยู่อาศัยของคุณในช่วงสองสัปดาห์ที่ผ่านมา | In the last two weeks, how satisfaction have you been with the interpersonal relationships in your household?<br>0 (not satisfy)   100 (very much satisfaction) |
| อย่างไรในช่วงสองสัปดาห์ก่อนเกิด โรคระบาด COVID-19                                              | And what about in the last two weeks of your "regular" life BEFORE the COVID-19 outbreak?<br>0 (not satisfy)   100 (very much satisfaction)                     |
| <b>ความพึงพอใจต่อปฏิสัมพันธ์ระหว่างสมาชิกในครอบครัว</b>                                        | <b>Pandemic family interaction satisfaction</b>                                                                                                                 |
| คุณพึงพอใจเพียงใดกับปฏิสัมพันธ์ระหว่างสมาชิกในครอบครัวในช่วงสองสัปดาห์ที่ผ่านมา                | In the last two weeks, how satisfaction have you been with your family interactions in your household?                                                          |

|                                                                                  |                                                                                                                                             |
|----------------------------------------------------------------------------------|---------------------------------------------------------------------------------------------------------------------------------------------|
|                                                                                  | 0 (not satisfy)   100 (very much satisfaction)                                                                                              |
| ปัญหาเหล่านี้ เคยเป็นอย่างไร ในก่อนช่วง 2 สัปดาห์ก่อนที่มีการระบาดของโรคโควิด-19 | And what about in the last two weeks of your "regular" life BEFORE the COVID-19 outbreak?<br>0 (not satisfy)   100 (very much satisfaction) |



**ESF1, Table 4.** Results of principal component analysis (PCA) performed on the affective symptom in pre-pandemic and pandemic condition.

| Loadings on PC pandemic G-AS |                                           | Loadings on PC pre-pandemic G-AS        |       |
|------------------------------|-------------------------------------------|-----------------------------------------|-------|
| Anxiety 1                    | 0.752                                     | Anxiety                                 | 0.802 |
| Anxiety 2                    | 0.785                                     |                                         |       |
| Depression 1                 | 0.805                                     | Depression                              | 0.863 |
| Depression 2                 | 0.804                                     |                                         |       |
| OCD 1                        | 0.828                                     | OCD                                     | 0.854 |
| OCD 2                        | 0.809                                     |                                         |       |
| PTSD 1                       | 0.858                                     |                                         |       |
| PTSD 2                       | 0.836                                     | PTSD                                    | 0.844 |
| PTSD 3                       | 0.819                                     |                                         |       |
| PTSD 4                       | 0.634                                     |                                         |       |
| Mood swings                  | 0.798                                     | Mood swings                             | 0.828 |
| KMO                          | KMO=0.911                                 | KMO=0.879                               |       |
| Barlett's $X^2$              | $X^2 = 96810.676$ , $df=55$ , $p < 0.001$ | $X^2 = 27891.308$ $df= 10$ , $p <0.001$ |       |
| VE                           | VE=63.399                                 | VE=70.319                               |       |

G-AS: new PCs are constructed, namely the general affective symptoms (G-AS) dimension during the pandemic and pre-pandemic conditions; KMO: Kaiser-Meyer-Olkin test for sampling adequacy; VE: variance explained.

See ESF, Table 1 for the explanation of the items.

**ESF1, Table 5.** Result of principal component analysis (PCA) performed on items reflecting the attribution of symptoms to self-isolation/distancing and observing to spread and knowing the risk of COVID-19 outbreaks (labeled as COVISO).

| Variables                             | PC_COVISO                  |
|---------------------------------------|----------------------------|
| Anxiety due to Spread /knowledge      | 0.716                      |
| Anxiety due to social distancing      | 0.736                      |
| Depression due to Spread / knowledge  | 0.784                      |
| Depression due to social distancing   | 0.808                      |
| OCD due to Spread / knowledge         | 0.772                      |
| OCD due to social distancing          | 0.826                      |
| PTSD due to Spread / knowledge        | 0.787                      |
| PTSD due to social distancing         | 0.806                      |
| Mood swings due to Spread / knowledge | 0.767                      |
| Mood swings due to social distancing  | 0.771                      |
| KMO                                   | KMO=0.869                  |
| Barlett's $X^2$                       | 37106,885, df=45, p <0.001 |
| VE                                    | VE=60.529                  |

KMO: Kaiser-Meyer-Olkin test for sampling adequacy. VE: variance explained.  
See ESF, Table 1 for the explanation of the items.

**ESF1, Table 6** Results of multiple regression analyses with the generalized affective symptom (G-AS) principal component score as dependent variable and pandemic and non-pandemic data as explanatory variables

| Variable      | Explanatory variable               | $\beta$ | t     | p       | R <sup>2</sup> | F             | df             | p                 |
|---------------|------------------------------------|---------|-------|---------|----------------|---------------|----------------|-------------------|
| Pandemic G-AS | <b>Model</b>                       | -       | -     | -       | <b>0.756</b>   | <b>556.75</b> | <b>11/1974</b> | <b>&lt; 0.001</b> |
|               | Basal G-AS                         | 0.764   | 55.67 | < 0.001 |                |               |                |                   |
|               | Family interaction satisfaction    | -0.073  | -6.32 | < 0.001 |                |               |                |                   |
|               | Composite ACE+NLE                  | 0.094   | 7.74  | < 0.001 |                |               |                |                   |
|               | Feeling isolated                   | 0.057   | 4.32  | < 0.001 |                |               |                |                   |
|               | Student                            | 0.059   | 4.75  | < 0.001 |                |               |                |                   |
|               | Pandemic social support*           | -0.067  | -5.75 | < 0.001 |                |               |                |                   |
|               | Pandemic physical pain*            | 0.046   | 4.01  | < 0.001 |                |               |                |                   |
|               | Number of mental disorders         | 0.040   | 3.45  | < 0.001 |                |               |                |                   |
|               | Financial loss due to the pandemic | 0.029   | 2.38  | 0.018   |                |               |                |                   |
|               | Age                                | -0.028  | 2.26  | 0.024   |                |               |                |                   |
|               | Pandemic fear of COVID-19*         | 0.025   | 2.13  | 0.034   |                |               |                |                   |

\* These values are adjusted for their baseline (pre-pandemic levels) using regression analysis

ACE: adverse childhood experiences, G-AS: general affective symptom score, NLE: negative life events,

**ESF1, Table 6** Results of multiple regression analyses with the suicidal ideation score as dependent variable and pandemic and non-pandemic risk factors as predictors.

| Variable                   | Explanatory variable               | $\beta$ | t      | p      | R <sup>2</sup> | F      | df      | p       |
|----------------------------|------------------------------------|---------|--------|--------|----------------|--------|---------|---------|
| Pandemic suicidal ideation | Model                              | -       | -      | -      | 0.233          | 144.78 | 13/6186 | < 0.001 |
|                            | Wave 4                             | 0.268   | 22.80  | <0.001 |                |        |         |         |
|                            | Number of mental disorders         | 0.156   | 13.45  | <0.001 |                |        |         |         |
|                            | Availability of protective devices | -0.156  | -13.48 | <0.001 |                |        |         |         |
|                            | Feeling isolated                   | 0.113   | 8.80   | <0.001 |                |        |         |         |
|                            | Number of ACEs                     | 0.081   | 5.92   | <0.001 |                |        |         |         |
|                            | Pandemic G-AS                      | 0.088   | 7.11   | <0.001 |                |        |         |         |
|                            | Fear of COVID                      | 0.066   | 5.62   | <0.001 |                |        |         |         |
|                            | Body mass index                    | 0.053   | 4.55   | <0.001 |                |        |         |         |
|                            | Financial loss due to the pandemic | 0.032   | 2.62   | 0.009  |                |        |         |         |
|                            | Age                                | -0.032  | -2.62  | 0.009  |                |        |         |         |
|                            | Number of NLEs                     | 0.031   | 2.26   | 0.024  |                |        |         |         |
|                            | Pandemic social support*           | -0.028  | -2.40  | 0.016  |                |        |         |         |
|                            | Pandemic physical pain*            | 0.027   | 2.30   | 0.021  |                |        |         |         |

\* These values are adjusted for their baseline (pre-pandemic levels) using regression analysis

ACE: adverse childhood experiences, G-AS: general affective symptom score, NLE: negative life events
