# Supplementary material
Source: HighWire-hosted journal article supplement (https://mentalhealth.bmj.com/content/27/1/e300982)
Supplement: inline-supplementary-material-3 [file inline-supplementary-material-3.pdf]

**ELECTRONIC SUPPLEMENTARY FILE 2 (ESF2)****Predictors of increased affective symptoms and suicidal ideation during the COVID-19 pandemic: a large-scaled study on 14,271 Thai adults.**

(1) Thitiporn Supasitthumrong\*, (1-7) Michael Maes\*, (1) Chavit Tunvirachaisakul, (1) Teerayuth Rungnirundorn, (5,6) Bo Zhou, (5,6) Jing Li, (1) Sorawit Wainipitapong, (1) Anchalita Ratanajaruraks, (1) Chaichana Nimnuan, (1) Buranee Kanchanatawan, (8) Trevor Thompson, (9-12) Christoph U. Correll\*\*, (11,13-15) Marco Solmi\*\*.

\* Joint first authorship.

\*\* Joint last authorship

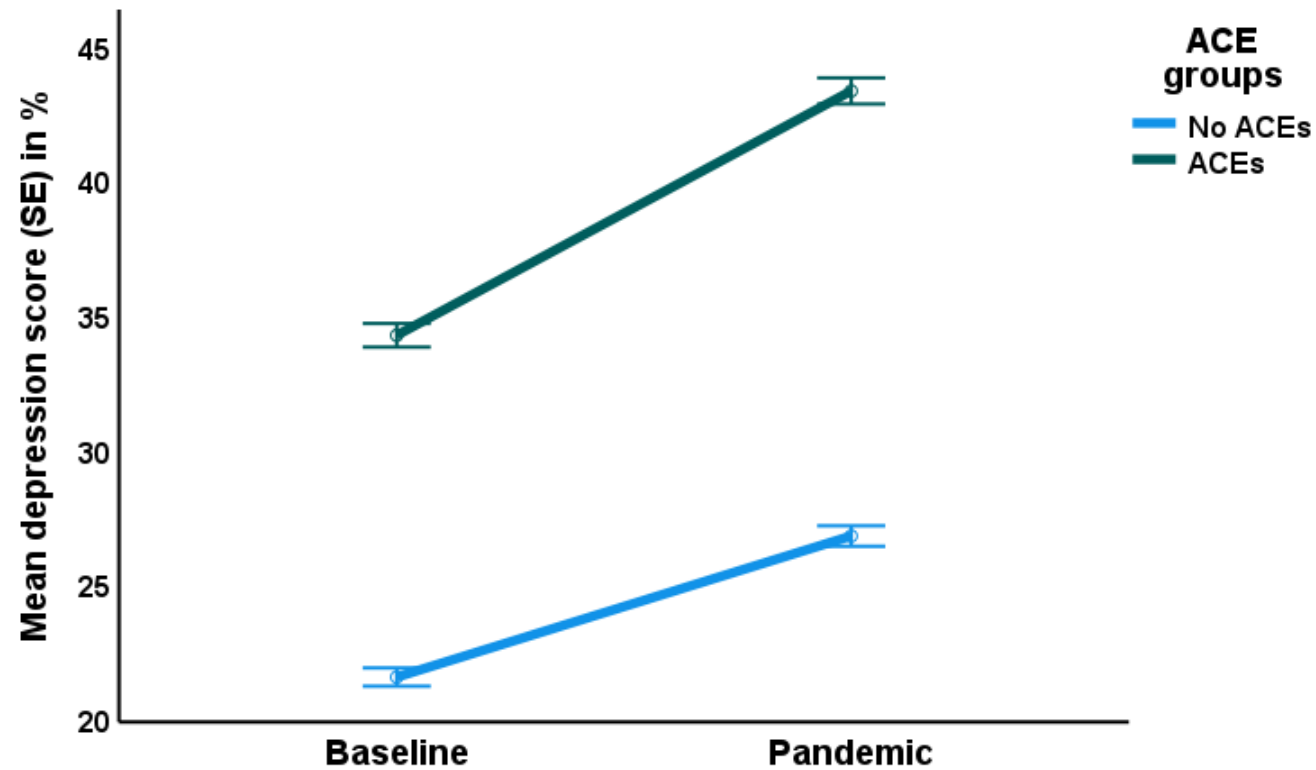

**ESF2, Figure 1.** Mean (SE) depression scores in subjects with and without adverse childhood experiences (ACEs). The interaction pattern time (baseline – pandemic) and ACE groups is significant ( $p < 0.001$ ). The response in depressive complaints during the pandemic is higher in subjects with one or more ACEs than in those without.

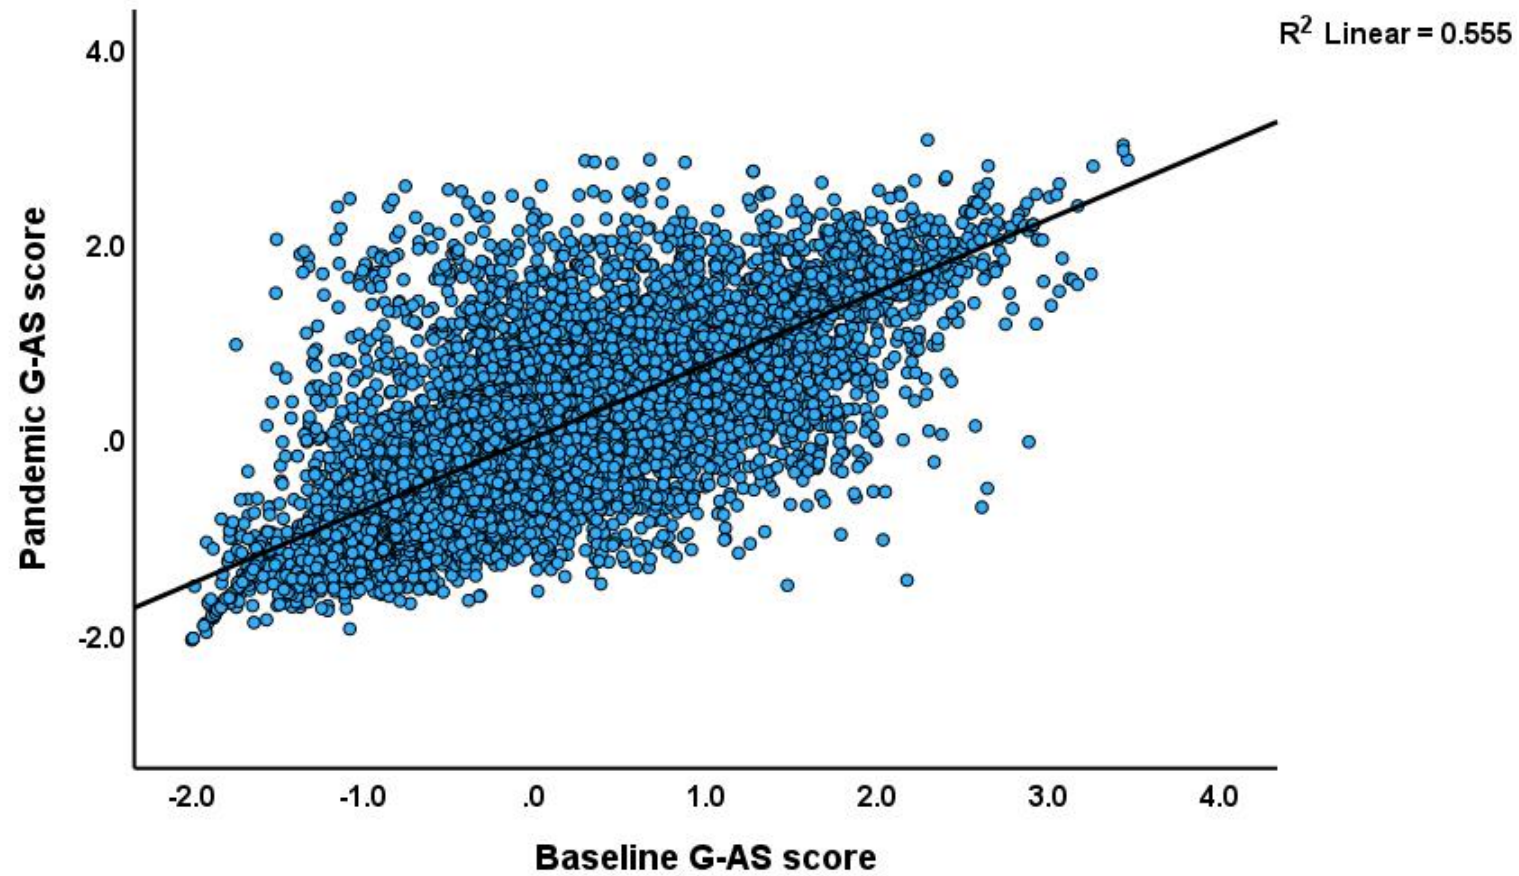

**ESF2, Figure 2.** Partial regression of the pandemic general affective symptom (G-AS) principal component score on the baseline (pre-pandemic) G-AS score, after adjusting for effects of age, sex, and the 4 pandemic waves ( $p < 0.0001$ )

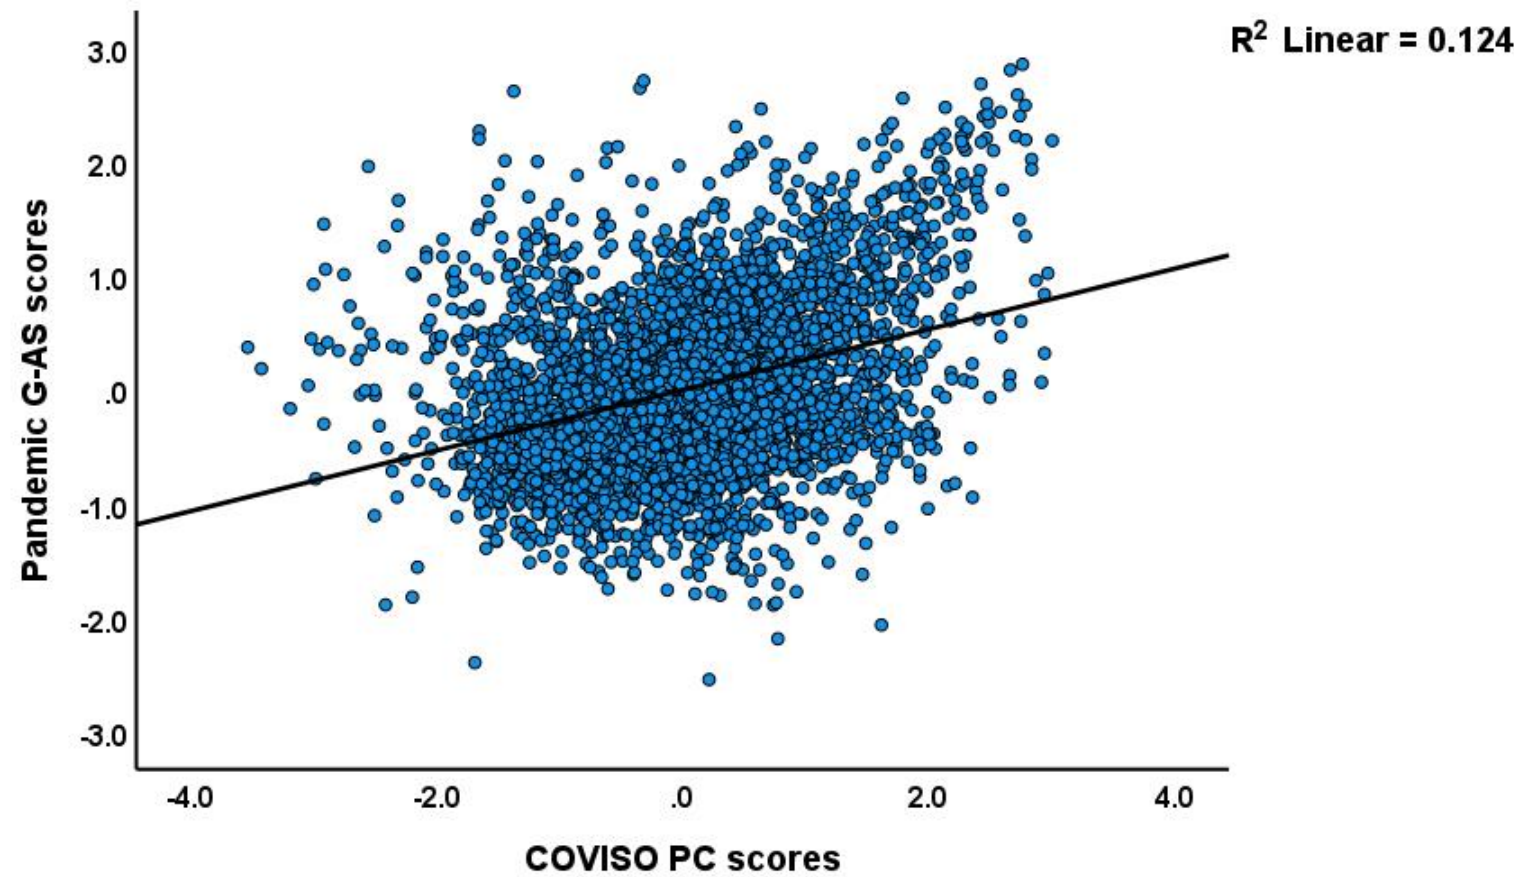

**ESF2, Figure 3.** Partial regression of the pandemic generalized affective symptom (G-AS) principal component (PC) score on the attributions of G-AS scores to the spread of COVID-19 and the knowledge on the risk of COVID-19 and social isolation/distancing (COVISO), after adjusting for effects of baseline G-AS score, age, sex, and the 4 pandemic waves ( $p < 0.001$ )

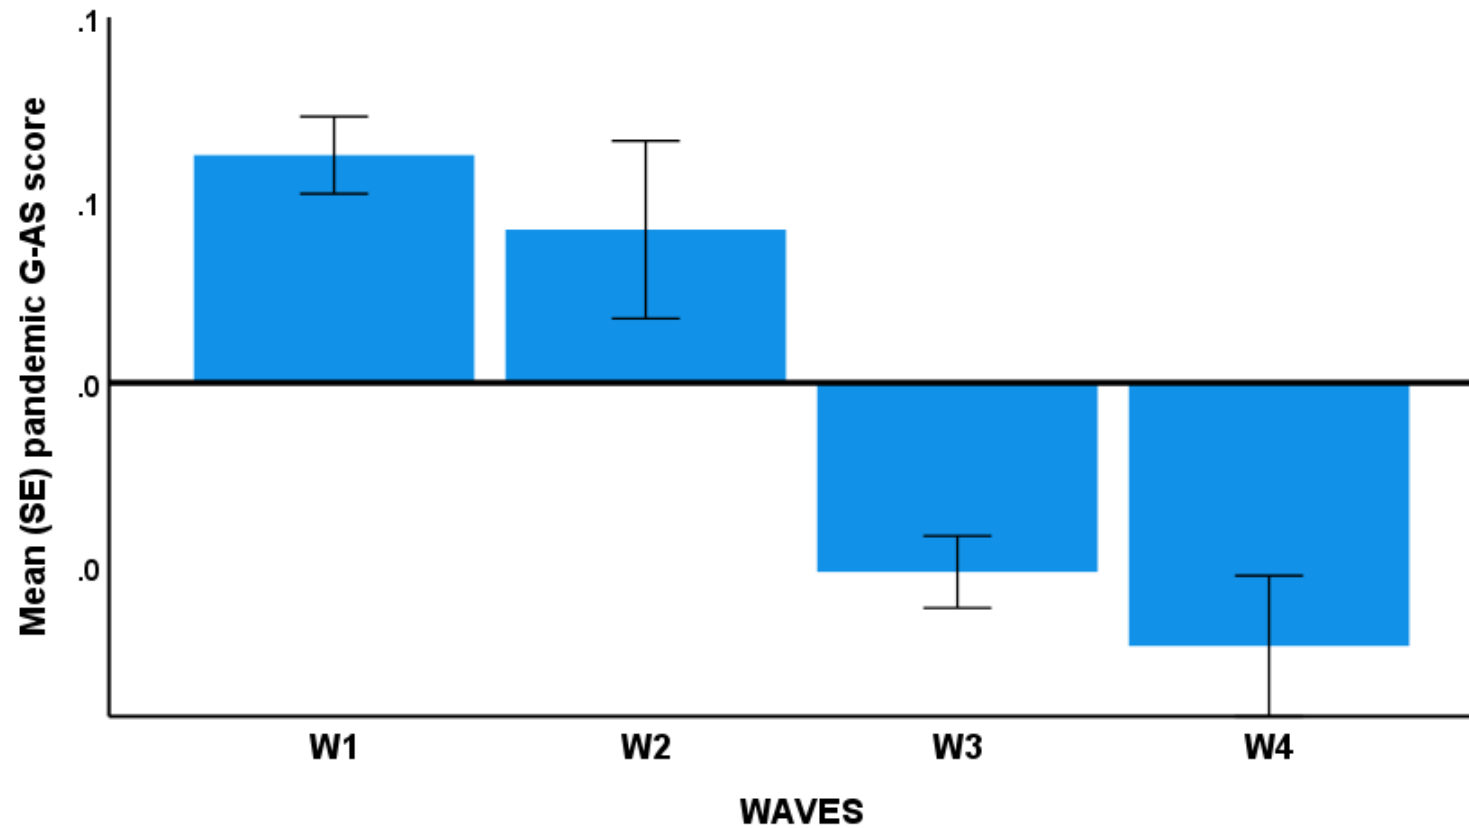

**ESF2, Figure 4.** The pandemic generalized affective symptom (G-AS) score (after adjusting for baseline G-AS scores, age, and gender) and the 4 pandemic waves as classes. The scores are significantly lower during waves W3 and W4 than W1 and W2 ( $p < 0.001$ ).

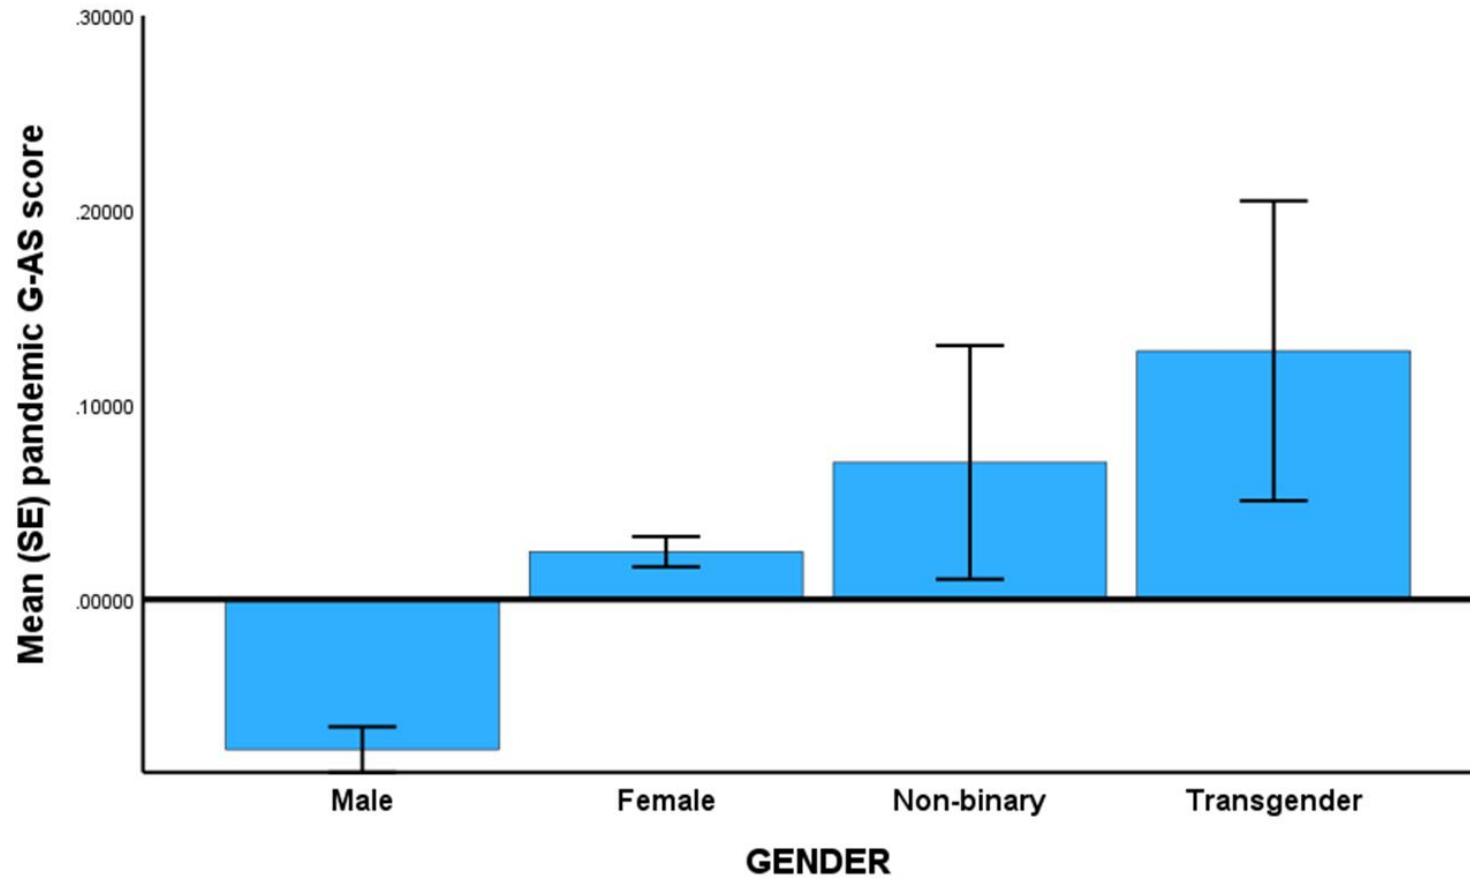

**ESF2, Figure 5.** The pandemic generalized affective symptom (G-AS) score (after adjusting for baseline G-AS scores, age, and the 4 pandemic waves). The scores are significantly higher in women, non-binary and transgender individuals than in males ( $p < 0.001$ ).

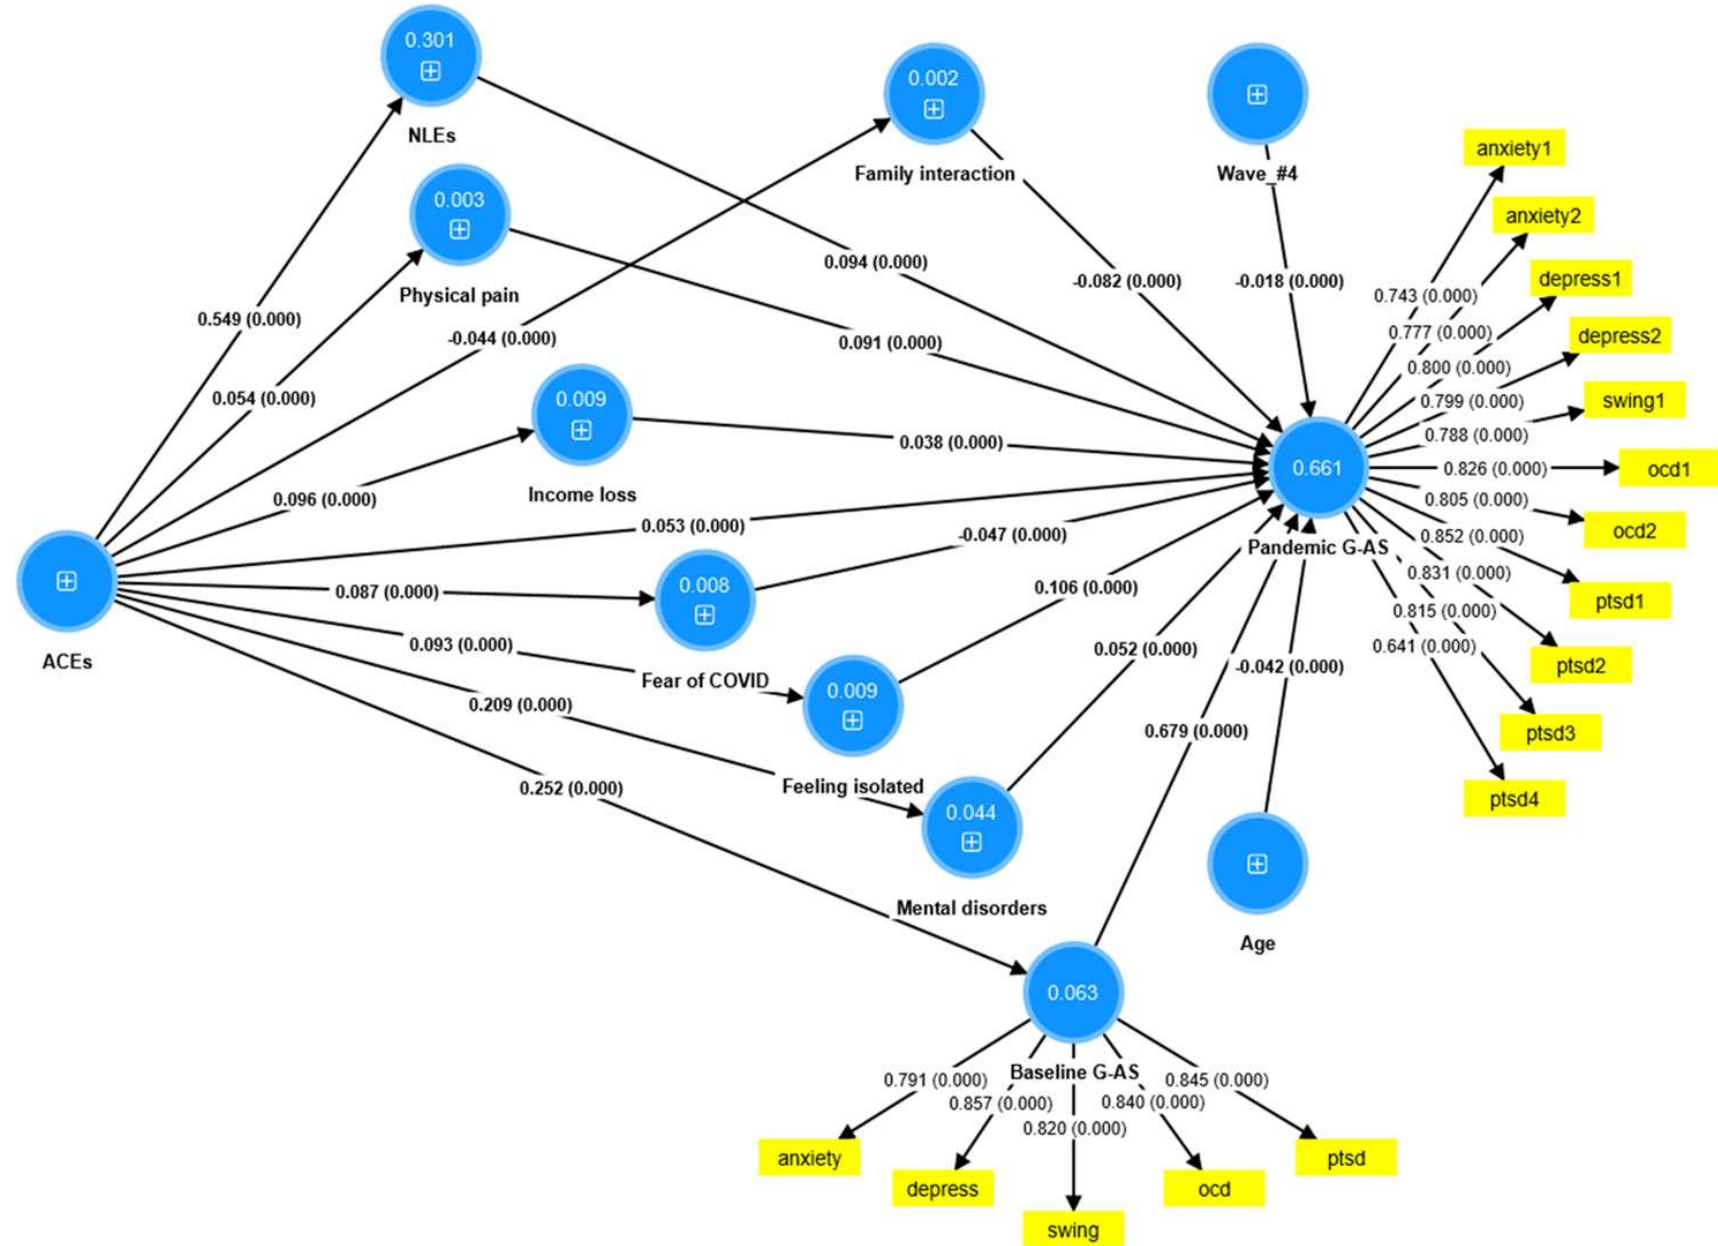

**ESF2, Figure 6.** Results of Partial Least Squares analysis (PLS) conducted on the four COVID waves. Shown is the complete outer model.

The pandemic and pre-pandemic general factor of affective symptoms (pandemic and baseline G-AS) are entered as factors extracted from 2 anxiety, 2 depression, 2 OCD, 4 PTSD and 1 mood swing item (see Pandemic G-AS and ESF, table 1 for explanation of the items), and one item for each of the 5 baseline G-AS domains. The other variables were entered as single indicators.

The model quality criteria are more than adequate:

- model fit is adequate with SRMR=0.018.
- factor loadings are adequate: all loadings (except PTSD4, namely 0.642) are  $> 0.666$  (at  $p < 0.001$ )
- average variance explained is  $> 50\%$ , namely 62.5% for pandemic G-AS and 69% for baseline G-AS.
- Cronbach's alpha is  $> 0.7$ , as shown as figures in the blue circles: 0.939 (pandemic G-AS) and 0.888 (baseline G-AS).
- confirmatory Tetrad analysis shows that the two factors are not mis-specified as reflective models.
- PLS Predict shows that all  $Q^2$  values are  $> 0$ , and CVPAT shows that the PLS-SEM outperforms the indicator averages and the linear model as well (all  $p < 0.05$ ), indicating strong replicability of the PLS model.

ACE: adverse childhood experiences; NLEs: negative life events; W4: the fourth pandemic wave (W4)

See Figure 6 and main text for interpretation of the model.



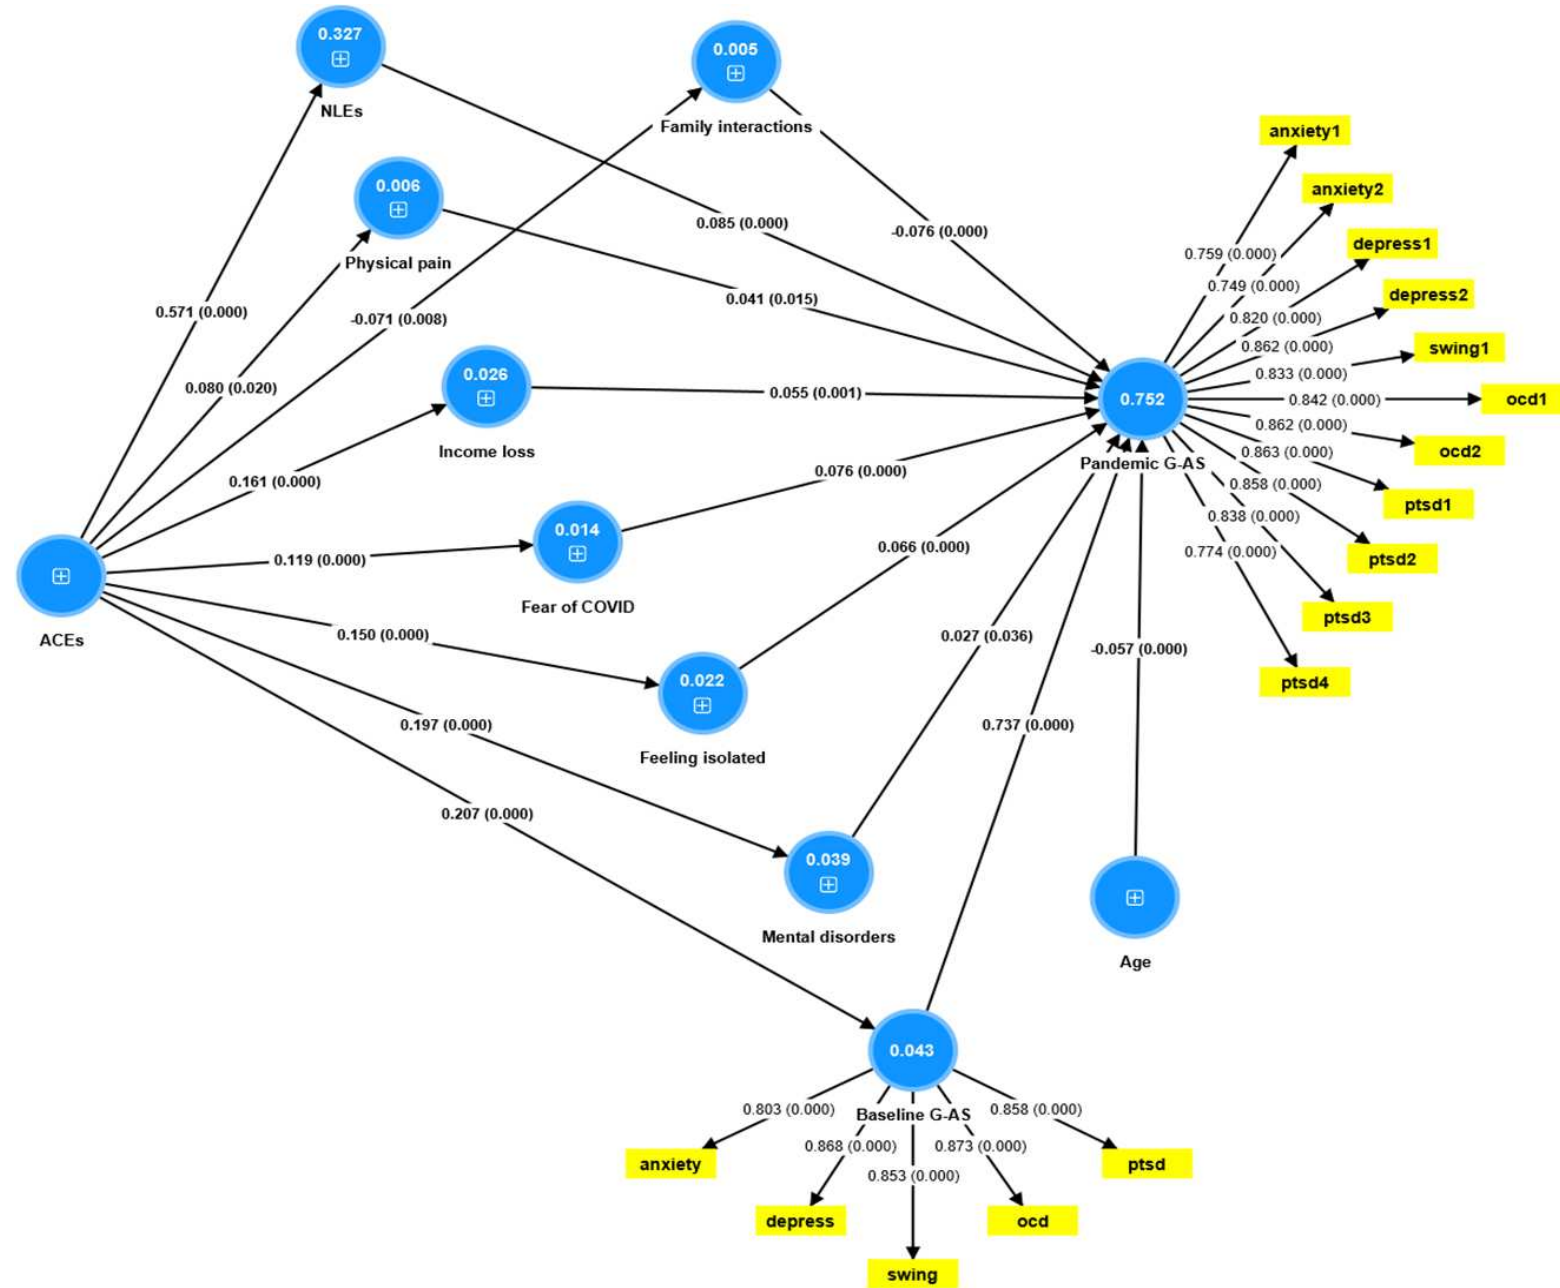

**ESF2, Figure 7.** Results of Partial Least Squares analysis (PLS) conducted on the representative sample collected during wave 4. Shown is the complete outer model.

The pandemic and pre-pandemic general factor of affective symptoms (pandemic and baseline G-AS) are entered as factors extracted from 2 anxiety, 2 depression, 2 OCD, 4 PTSD and 1 mood swing item (see Pandemic G-AS and ESF, table 1 for explanation of the items), and one item for each of the 5 baseline G-AS domains.

The model quality criteria are more than adequate:

- model fit is adequate with SRMR=0.021.
- all factor loadings are  $> 0.666$  (at  $p < 0.001$ )
- average variance explained is  $> 50\%$ , namely 68.0% for pandemic G-AS and 72.5% for baseline G-AS.
- Cronbach's alpha is  $> 0.7$ , namely 0.953 for the pandemic G-AS and 0.905 for the baseline G-AS.
- confirmatory Tetrad analysis shows that the two factors are not mis-specified as reflective models.
- PLSpredict shows that all  $Q^2$  values are  $> 0$ , and CVPAT overall shows that the PLS-SEM outperforms the indicator averages and the linear model as well (all  $p < 0.05$ ), indicating strong replicability of the PLS model.

ACE: adverse childhood experiences; NLEs: negative life events
